# Title: A habitat class to land cover translation model for mapping Area of Habitat of terrestrial vertebrates

**Authors:** Maria Lumbierres<sup>1,3</sup>, Prabhat Raj Dahal<sup>1,3</sup>, Moreno Di Marco<sup>2</sup>, Stuart H. M. Butchart<sup>3,4</sup>, Paul F. Donald<sup>3,4</sup>, Carlo Rondinini<sup>1</sup>

## Author's address

1- Global Mammal Assessment Program, Department of Biology and Biotechnologies, Sapienza University of Rome, Viale dell'Università 32, 00185 Rome, Italy

2- Department of Biology and Biotechnologies, Sapienza University of Rome, Viale dell'Università 32, 00185 Rome, Italy

3- BirdLife International, David Attenborough Building, Pembroke Street, Cambridge CB2 3QZ, UK

4- Conservation Science Group, Department of Zoology, University of Cambridge, Downing Street, Cambridge CB2 3EJ, UK

**Abstract:** Area of Habitat (AOH) is defined as the 'habitat available to a species, that is, habitat within its range' and is produced by subtracting areas of unsuitable land cover and elevation from the range. Habitat associations are documented using the IUCN Habitats Classification Scheme, and unvalidated expert opinion has been used so far to match habitat to land-cover classes generating a source of uncertainty in AOH maps. We develop a data-driven method to translate IUCN habitat classes to land-cover based on point locality data for 6,986 species of terrestrial mammals, birds, amphibians and reptiles. We extracted the land-cover class at each point locality and matched it to the IUCN habitat class(es) assigned to each species occurring there. Then we modelled each land cover class as a function of IUCN habitat using logistic regression models. The resulting odds ratios were used to assess the strength of the association of each habitat land-cover class. We then compared the performance of our data-driven model with those from a published expert knowledge translation table. The results show that some habitats (e.g. forest and desert) could be more confidently assigned to land-cover classes than others (e.g. wetlands and artificial). We calculated the association between habitat classes and land-cover classes as a continuous variable, but to map AOH, which is in the form of a binary presence/absence, it is necessary to apply a threshold of association. This can be chosen by the user according to the required balance between omission and commission errors. We demonstrate that a data-driven translation model and expert knowledge perform equally well, but the model provides greater standardization, objectivity and repeatability. Furthermore, this approach allows greater flexibility in the use of the results and allows uncertainty to be quantified. Our model can be developed regionally or for different taxonomic groups.

**Keywords:** Habitat suitability models, commission and omission errors, Copernicus Global Land Service Land Cover (CGLS-LC100), ESA Climate Change Initiative (ESA-CCI), IUCN habitat, IUCN Red List.

## INTRODUCTION

Habitat loss is the most important driver of biodiversity decline (Díaz et al., 2019). Therefore, there is an urgent need to determine where habitat is located within each species' distribution (Pimm et al., 2014; Brooks et al., 2019). Several approaches have been developed to map global species' distributions, but accurate spatial data are only available for a limited number of species (Rondinini et al., 2005; Rondinini & Boitani 2012).

The most complete dataset of maps of species' ranges is that available in the International Union for Conservation of Nature (IUCN) Red List ([www.iucnredlist.org](http://www.iucnredlist.org)). The IUCN Red List has assessed more than 134,400 species, and species groups, including mammals, amphibians, and birds, have been comprehensively assessed. The IUCN range maps are generally drawn to minimize errors of omission (i.e. false absence), with the result that they often contain substantial areas that are not occupied by the species, and so suffer from errors of commission (i.e. false presence) (Ficetola et al., 2014; Di Marco et al., 2017).

50

51 Area of Habitat (AOH; previously known as extent of suitable habitat, or ESH) is the ‘habitat available to a  
52 species, that is, habitat within its range’ (Brooks et al., 2019). AOH maps are produced by subtracting  
53 unsuitable areas from range maps, using data on each species’ associations with land cover and altitude  
54 (Beresford et al., 2011; Rondinini et al., 2011; Ficetola et al., 2015), and attempts to reduce commission errors  
55 in range maps. Therefore, the production of AOH maps requires an understanding of which habitats a species  
56 occurs in and where those habitats are located within its range.

57

58 Information on habitat preferences is documented for each species assessed on the IUCN Red List (IUCN  
59 2013) following the IUCN Habitats Classification Scheme (IUCN habitat; IUCN, 2012), a classification and  
60 coding system of habitats that ensures global consistency. IUCN standardized habitat definitions independently  
61 of taxonomy or geography. However, IUCN habitat classes are not spatially explicit, although recent efforts  
62 have attempted to delimit them (Jung et al., 2020). Land-cover classes derived from remote sensing have been  
63 widely used as a surrogate of habitat (e.g. Buchanan et al., 2008; Beresford et al., 2011; Rondinini et al., 2011;  
64 Tomaselli et al., 2013; Montesino Pouzols et al., 2014; Corbane et al., 2015; Santini et al., 2019), although  
65 habitat is a complex multi-dimensional concept that is difficult to simplify into land-cover classes.

66

67 A translation table between habitat and land-cover classes is typically used to represent IUCN habitat classes  
68 spatially and to produce AOH maps. This is a table that shows which habitat classes map onto which land-  
69 cover classes. Previous versions have been based solely on expert knowledge, raising concerns about the  
70 accuracy and objectivity of the resulting associations, as the assumptions generated in the translation process  
71 are rarely considered in detail and the errors are difficult or impossible to quantify (Bradley et al., 2012).  
72 Furthermore, there is a lack of standardization in the procedure (Seoane et al., 2005), which is subject to  
73 variability in expert opinion (Johnson & Gillingham, 2004).

74

75 Repositories of point locality data (i.e. locational records where particular species have been recorded  
76 (Rondinini et al., 2006)) primarily from citizen science have been successfully used in habitat suitability  
77 models (e.g. Gueta & Carmel, 2016; Bradter et al., 2018; Crawford, Olds, Maerz, & Moore, 2020). The  
78 potential, therefore, exists to use such data also to develop an objective data-driven translation table between  
79 habitat and land-cover classes by extracting information on land cover from point localities of species with  
80 different habitat associations.

81

82 Here we propose a standardized, data-driven methodology to produce a translation table between IUCN habitat  
83 classes and two widely used global land-cover maps, the Copernicus Global Land Service Land Cover (CGLS-  
84 LC100; Copernicus Global Land Operations “Vegetation and Energy”, 2018a; Buchhorn et al., 2019) and the  
85 European Space Agency Climate Change Initiative land cover 2015 (ESA-CCI; ESA, 2017) using point  
86 locality data for mammals, birds, amphibians and reptiles (the best-documented groups of species). The aim  
87 of this analysis was to develop a translation table that quantifies the power of association between land cover  
88 and habitat classes. In doing so, we aim to illustrate a method that improves on expert opinion by (a)  
89 quantifying errors in associations between habitat and land cover classes, (b) being flexible to the needs of the  
90 user in terms of the required trade-off between reducing commission errors and increasing omission errors,  
91 and (c) can be developed at different spatial scales, for different taxa, using any set of habitat or land-cover  
92 classes.

93

## 94 **METHODS**

### 95 **Data cleaning and preparation**

96 We downloaded point locality data for mammals (GBIF, 2019; GBIF, 2020), amphibians (GBIF, 2020) and  
97 reptiles (GBIF, 2020) from the Global Biodiversity Information Facility (GBIF) and for birds from GBIF  
98 (GBIF, 2019; GBIF, 2020) and eBird (eBird Basic Dataset, 2019). The data were restricted to point localities

99 dated from January 2005 to December 2018 for the model building (70% training and 30% test), and from  
 100 January 2019 to December 2020 for the evaluation of the model. For eBird data, we selected only stationary  
 101 point localities with a coordinate uncertainty of less than 30 m. To minimize errors, and uncertainties inherent  
 102 to repositories of point locality data, we included only the most precisely georeferenced points (Rondinini et  
 103 al., 2006; Meyer 2012) and applied a set of filters following the guidelines of Boitani et al., (2011). The main  
 104 attributes considered were currency, spatial accuracy and spatial coverage (Fig. 1).

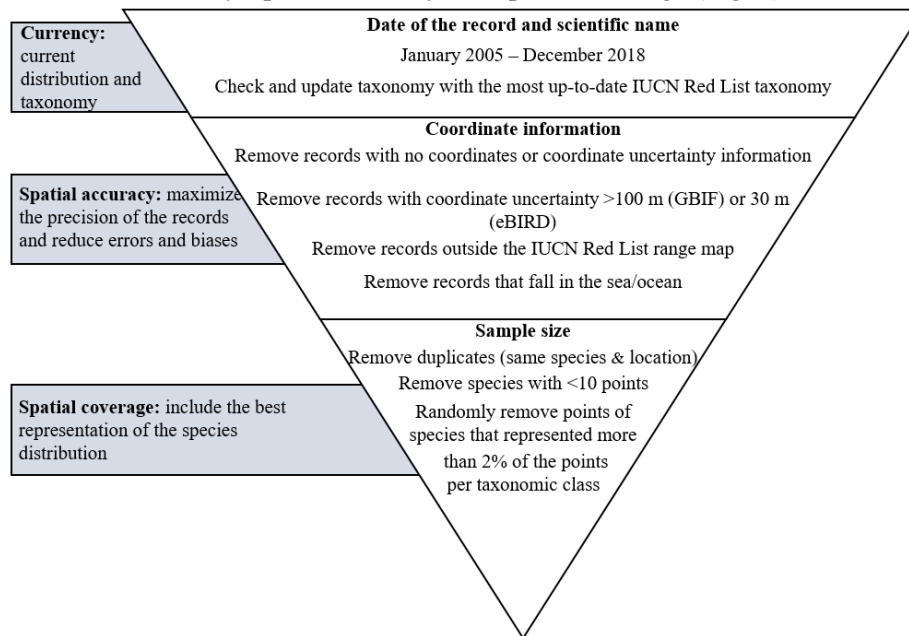

105

*Figure 1 . Description of the point locality cleaning process, following Boitani et al., (2011). The factors considered were currency, spatial accuracy and spatial coverage. The filters were applied from top to bottom.*

106 To make it clear where we are referring to explicit classes, we present land-cover class names in quotation  
 107 marks and IUCN habitat class names in italics.

108

109 The habitat class(es) association of each species were extracted from the IUCN habitat (IUCN, 2020). These  
 110 follow a hierarchical classification of habitat with three levels. The definitions consider biogeography,  
 111 latitudinal zonation and depth in marine systems. In this analysis, we used Level-1 habitat classes for all  
 112 habitats except for artificial terrestrial, for which we used a modification of Level-2 (Appendix S1). We  
 113 subdivided artificial terrestrial into three subclasses because in terms of land cover these are distinct habitat  
 114 classes that could aggregate different species (Ducatez et al., 2018).

115

116 Because the land-cover classes from the two remote sensing products are exclusively terrestrial, we limited the  
 117 analysis to species coded only to terrestrial habitat classes, thus excluding species coded to one or more IUCN  
 118 marine habitats. We also excluded species coded to more than five Level-1 habitat classes, because habitat  
 119 generalists are likely to add little information to the habitat-land cover relationship. In contrast, specialist  
 120 species coded to only one habitat class provide more insight into the relationship between habitat and land  
 121 cover. For that reason, for each taxonomic class, we randomly subsampled point records from species coded  
 122 to more than one habitat class to match the number of points of species coded to one habitat and thereby gave  
 123 equal weight to habitat specialists even when they had fewer points.

124

125 We developed models for two different global land-cover products derived from remote sensing: CGLS-LC100  
 126 and ESA-CCI. The CGLS-LC100 has a 100-m spatial resolution and a global classification accuracy of 80.2%  
 127 (Copernicus Global Land Operations “Vegetation and Energy”, 2018b). The ESA-CCI has a 300-m spatial  
 128 resolution and a global classification accuracy of 71.1% (ESA 2017). It is part of a time series from 1992 to  
 129 2015, of which we used the 2015 map. Both products use the United Nations Food and Agriculture

130 Organization Land Cover Classification System (UN-LCCS), although they have different legends. CGLS-  
131 LC100 has 12 land-cover classes at Level-1 and 23 classes at Level-3 (Level-2 is not used by CLGS-LC100),  
132 and we used Level-3. ESA-CCI has 22 land-cover classes at Level-1 and 38 classes at Level-2. In this analysis,  
133 we only used Level-1 because Level-2 is only available for some regions of the globe.

134

135 To prepare the data for the model, we extracted the land-cover class at the coordinates of each point locality.  
136 Some land-cover classes did not have enough point localities falling within them to be modeled, although in  
137 all cases these were land-cover classes with very low global coverage. For CGLS-LC100, the under-  
138 represented land-cover classes were “open forest deciduous needle leaf” (10 points, 0.03% of global land  
139 surface), “snow and ice” (108 points, 3.1% of global land surface), “moss and lichen” (124 points, 2.3% of  
140 global land surface) and “closed forest deciduous needle leaf” (383 points, 3.0% of global land surface). For  
141 ESA-CCI, the only class represented too infrequently for analysis was “lichens and mosses” (713 points, 2.2%  
142 of global land surface).

143

#### 144 **Modeling of habitat-land cover associations**

145 To quantify the relationship between IUCN habitat classes and land-cover classes, we modeled the presence  
146 or absence of each land-cover class as a function of the IUCN habitat class(es) of the species whose point  
147 localities fell within it. An important consideration for modeling was that the number of habitat classes per  
148 species varied from one to five. Therefore, it was impossible to model land-cover class as a one-to-one  
149 relationship with habitat classes, as each point location was associated with one or multiple habitats. This  
150 consideration restricted the number of models we could use for our analysis. We required a flexible model that  
151 allowed a many-to-many match between habitat classes and land-cover classes to model this matrix of habitat  
152 vs land-cover class relations. In multinomial logistic regression models, the data and the computational power  
153 requirements increase exponentially with the number of response categories. In our case, with more than 20  
154 land-cover categories, this option was not feasible. Therefore, we modeled each land-cover class separately,  
155 transforming it into a binary variable of 1 or 0 (land cover present/not present in a point locality). Then, we  
156 used logistic regressions to model the binary land-cover class variable as a function of the different habitat  
157 classes:

$$158 \quad [1] \log \frac{p_{lc}}{1 - p_{lc}} = \beta_0 + \beta_1 H_{Forest} + \beta_2 H_{Savanna} + \beta_3 H_{Shrubland} + \beta_4 H_{Grassland} + \beta_5 H_{Wetlands} + \beta_6 H_{RockyAreas}$$
$$159 \quad + \beta_7 H_{Desert} + \beta_8 H_{Artificial1} + \beta_9 H_{Artificial2} + \beta_{10} H_{Artificial3} + \beta_{11} H_{Artificial4}$$

160 where  $(p_{lc}/(1-p_{lc}))$  is the land cover odds ratio and  $\beta_x$  are the model parameters for each of the habitats  $H_x$ .

161

162 The transformation of the land-cover class into a binary form for each of the models generated a highly  
163 unbalanced variable, with many more zeroes than ones. In a logistic regression model, unbalanced data  
164 underestimate the probability of an event so it is recommended to adjust the number of 1s and 0s (King & Zeng  
165 2001; Pozzolo et al., 2015). We therefore randomly subsampled the 0s in the training set before running the  
166 model. The assumption behind this is that in the majority class there are many redundant observations and  
167 randomly removing some of them does not change the estimation of the within-class distribution (Pozzolo et  
168 al., 2015).

169

170 To reduce the intrinsic spatial and taxonomic bias point locality data (Boitani et al., 2011; Meyer et al., 2016),  
171 and to account for multiple but varying numbers of point localities per species, we added taxonomic and spatial  
172 variables as random effects in the model (Bird et al., 2014). As taxonomic variables, we added species nested  
173 within taxonomic class (Amphibia, Reptilia, Aves, Mammalia). Adding intermediate taxonomic groupings  
174 (e.g. family or genus) in the nesting would result in many factor levels with single or very few replicates. To  
175 test whether there was any bias between taxonomic classes, we first produced separate models for each class,  
176 and found that the association between land cover and habitat classes from the different translation tables were  
177 very similar; therefore, we decided to model all classes together. As a spatial variable, we added the country  
178 of the point record as a random effect.

179

180 We used the coefficients of the models to evaluate the association between land-cover class and habitat classes.  
181 The intercept did not provide any information on the relationship between land-cover class and habitat class  
182 as it represents the odds of a point locality falling within a particular land-cover class after the subsampling of  
183 the data set, independently of the habitat (Ranganathan et al., 2017). The coefficients represent the odds ratio,  
184 in other words, the odds of a point locality falling in a particular land-cover class (when the species to which  
185 the point locality relates is coded for a particular habitat class) divided by the odds of the species occurring in  
186 that land-cover class when it is not coded for that habitat class. The ratio, therefore, indicates the extent to  
187 which being coded to a particular habitat class increases or decreases the odds of a species being found in a  
188 particular land-cover class. The units of the logit function are  $\log(\text{odds ratio})$ , but for easier interpretation, we  
189 exponentiated them and present the results as odds ratios.

190

191 Odds ratio values below 1 indicate a negative association between land cover and habitat classes, while those  
192 above 1 indicate a positive association. As the odds ratio is a continuous variable, it is necessary to set a  
193 threshold to transform the results into a binary translation table that can be used to assign, or not, a particular  
194 habitat class to a particular land-cover class. The threshold can be modified according to the needs of the user  
195 based on the required balance between minimizing commission errors (land-cover classes incorrectly  
196 associated with a habitat class) and increasing omission errors (land-cover classes incorrectly omitted from a  
197 habitat class). Coefficients that had  $p$ -values higher than 0.05 were considered to indicate a lack of association  
198 between land cover and habitat classes. To adjust the significance threshold of the  $p$ -values for multivariable  
199 analysis, we used Bonferroni corrections.

200

201 To validate the models, we set aside 30% of the point occurrence data for testing, leaving 70% to train the  
202 model. As a validation test, we used the Area Under the Curve (AUC) from a Receiver Operating Characteristic  
203 (ROC) curve. AUC is a model accuracy measure that provides information on how well a model can distinguish  
204 among classes. In our case, we used it to test how well the models predicted the presence/absence of a point  
205 locally in a given land cover class. AUC values range from 0 to 1, a value of 0.5 means that the model does  
206 not performs better than random, while a value of 1 indicates that the model can perfectly separate the two  
207 groups.

208

209 We then compared the performance of the data-driven translation table with that of an expert knowledge  
210 translation table (Santini et al., 2019) based on the same ESA-CCI land cover classification used here. We did  
211 not find any published translation table that used CGLS-LC100. Santini et al., matched the ESA CCI land  
212 cover classes against Level-2 IUCN habitat classes, so we aggregated the habitat classes to Level-1 IUCN  
213 habitat classes to make the two translation tables comparable. We limited the comparison to birds and mammals  
214 because they were the taxonomic groups considered by Santini et al., For each species we mapped suitable  
215 habitat based on both tables. We assessed the proportion of points located in the suitable habitat (point  
216 prevalence) and compared it with the proportion of suitable habitat inside the species' range (model prevalence)  
217 to determine whether the results were better than a randomly assigned set of points (Rondinini et al., 2011).

218

## 219 RESULTS

220 The number of point localities and species available for this analysis was 200,683 and 455 respectively for  
221 mammals, 4,083,510 and 5,154 for birds, 92,327 and 479 for amphibians, and 131,077 and 898 for reptiles.  
222 For the CGLS-LC100 land-cover product, 71 coefficients showed a significantly positive association (odds  
223 ratio  $>1$ ) and 38 coefficients showed a significantly negative association (odds ratio  $<1$ ) between land-cover  
224 classes and habitat classes (Fig. 2). For the ESA-CCI land-cover product, 101 coefficients showed a  
225 significantly positive association and 40 coefficients showed a significantly negative association (Fig. 3).



| IUCN Habitat class \ Land-cover class         | Forest | Savanna | Shrubland | Grassland | Wetlands | Rocky areas | Desert | Artificial arable and pasture lands | Artificial degraded forest and plantation | Artificial urban areas and rural gardens | Artificial Aquatic | AUC   |
|-----------------------------------------------|--------|---------|-----------|-----------|----------|-------------|--------|-------------------------------------|-------------------------------------------|------------------------------------------|--------------------|-------|
| Shrubs                                        | 0.309  | 1.870   | 2.683     | 1.188     | -        | 1.383       | 4.225  | -                                   | 0.711                                     | -                                        | -                  | 0.882 |
| Herbaceous vegetation                         | 0.372  | 1.180   | 1.622     | 2.369     | 1.204    | 1.506       | 1.517  | 1.296                               | 0.880                                     | 1.262                                    | -                  | 0.793 |
| Cultivated and managed vegetation agriculture | 0.588  | 1.570   | 1.395     | 1.748     | 1.875    | 0.687       | -      | 1.743                               | -                                         | 1.330                                    | 1.523              | 0.807 |
| Urban / built up                              | -      | -       | 1.362     | -         | 1.351    | -           | -      | 1.488                               | 1.293                                     | 3.183                                    | 1.696              | 0.763 |
| Bare / sparse vegetation                      | 0.139  | -       | 2.026     | 1.524     | -        | 3.380       | 8.192  | -                                   | 0.489                                     | -                                        | -                  | 0.924 |
| Permanent water bodies                        | 0.603  | -       | -         | -         | 2.189    | -           | 0.698  | 1.236                               | -                                         | 1.447                                    | 1.712              | 0.745 |
| Herbaceous wetland                            | 0.732  | 1.240   | -         | 1.248     | 3.185    | 0.631       | 0.367  | 1.215                               | 1.220                                     | 1.396                                    | 2.360              | 0.827 |
| Closed forest, evergreen needle leaf          | 3.824  | 0.384   | -         | 0.706     | -        | -           | 0.229  | 0.592                               | 0.530                                     | -                                        | 0.674              | 0.885 |
| Closed forest, deciduous needle leaf          | 13.720 | 0.455   | 0.382     | 0.475     | -        | 0.483       | 0.052  | 0.735                               | 1.516                                     | 0.748                                    | -                  | 0.940 |
| Closed forest, deciduous broad leaf           | 2.520  | 1.704   | -         | -         | 1.560    | -           | 0.174  | -                                   | -                                         | 1.435                                    | -                  | 0.867 |
| Closed forest, mixed                          | 5.461  | 0.548   | 0.671     | -         | 1.523    | -           | -      | -                                   | -                                         | -                                        | -                  | 0.906 |
| Closed forest, unknown                        | 1.971  | -       | -         | -         | 1.312    | -           | 0.389  | -                                   | 1.264                                     | -                                        | 1.345              | 0.736 |
| Open forest, evergreen needle leaf            | 2.171  | 0.476   | -         | -         | -        | 1.790       | 0.578  | -                                   | 0.454                                     | -                                        | -                  | 0.856 |
| Open forest, evergreen broad leaf             | 2.442  | 0.801   | -         | -         | -        | 0.562       | 0.160  | -                                   | 1.566                                     | -                                        | -                  | 0.894 |
| Open forest, deciduous broad leaf             | 1.391  | 2.172   | -         | -         | 1.658    | -           | 0.251  | -                                   | -                                         | 1.398                                    | -                  | 0.854 |
| Open forest, mixed                            | 3.038  | -       | -         | -         | -        | -           | -      | -                                   | -                                         | -                                        | -                  | 0.899 |
| Open forest, unknown                          | 1.138  | 1.368   | 1.284     | -         | 1.302    | -           | 0.673  | 1.221                               | 1.138                                     | 1.167                                    | 1.341              | 0.644 |

  Positive association (odds ratio = 1.138 - 1.351)    
  Positive association (odds ratio = 1.362 - 1.712)    
  Positive association (odds ratio = 1.743 - 13.720)

  Negative association    
  Non significant association

226

Figure 2. Odds ratio values describing the association between CGLS-LC100 land-cover classes and IUCN habitat classes. Odds ratio values significantly < 1 indicate a negative association, and values significantly > 1 indicate a positive association. The significantly positive associations are divided into tertiles (shown in shades of green), indicating three possible options for setting a threshold to convert continuous variables into a binary association/non-association variable for creating AOH maps. AUC indicates the values of Area Under the Curve from a ROC, a measure of accuracy of a classification model.

227

228 Higher odds ratios (>1) indicated stronger positive associations between land cover and habitat classes, and  
229 lower odds ratios (nearer to zero) indicated stronger negative associations. We divided the significantly positive  
230 values into tertiles to identify three potential thresholds for creating a table of binary association/non-  
231 association variables for producing AOH maps: 1.138-1.351, 1.362-1.712 and 1.743-13.720 for CGLS-LC100,  
232 and 1.121-1.393, 1.396-1.704 and 1.708-19.148 for ESA-CCI.

233 *Forest* and *Desert* had the strongest positive associations between land cover and habitat classes. The *Forest*  
234 habitat class was associated with almost all the forest and tree cover land-cover classes (CGLS-LC100 average  
235 positive odds ratio = 3.8; ESA-CCI average positive odds ratio = 4.0) and with no other land-cover classes.  
236 The *desert* habitat class was also strongly associated with particular land-cover classes: “shrubs”, “herbaceous  
237 vegetation”, and “bare/sparse vegetation” in CGLS-LC100 (average positive odds ratio = 4.6) and “shrubland”,  
238 “grassland”, “sparse vegetation (tree, shrub, herbaceous cover < 15%)” and “bare areas” in ESA-CCI (average  
239 positive odds ratio = 3.0). *Rocky areas* were associated with almost the same land-cover classes as *Desert* but  
240 with lower odds ratios.

241

| IUCN Habitat class \ Land-cover class                                            | Forest | Savanna | Shrubland | Grassland | Wetlands | Rocky areas | Desert | Artificial arable and pasture lands | Artificial degraded forest and plantation | Artificial urban areas and rural gardens | Artificial Aquatic | AUC   |
|----------------------------------------------------------------------------------|--------|---------|-----------|-----------|----------|-------------|--------|-------------------------------------|-------------------------------------------|------------------------------------------|--------------------|-------|
| Cropland, rainfed                                                                | 0.662  | 1.609   | 1.417     | 1.415     | 1.660    | -           | -      | 1.617                               | 1.309                                     | 1.393                                    | 1.613              | 0.824 |
| Cropland, rainfed: herbaceous cover                                              | 0.732  | 1.434   | 1.389     | 1.674     | 1.581    | -           | -      | 1.922                               | -                                         | 1.453                                    | 1.678              | 0.821 |
| Cropland, rainfed: tree or shrub cover                                           | -      | -       | -         | -         | -        | -           | 0.354  | -                                   | 1.613                                     | -                                        | -                  | 0.960 |
| Cropland irrigated or post-flooding                                              | -      | -       | -         | 1.704     | 1.996    | -           | -      | 1.763                               | 1.396                                     | 1.357                                    | 1.708              | 0.954 |
| Mosaic cropland (>50%) /natural vegetation (tree, shrub, herbaceous cover)(<50%) | -      | 1.183   | 1.234     | 1.253     | 1.363    | -           | 0.750  | 1.475                               | 1.283                                     | 1.232                                    | -                  | 0.773 |
| Mosaic natural vegetation (tree, shrub, herbaceous cover) (>50%)/cropland (<50%) | 1.281  | -       | 1.121     | 1.163     | 1.326    | -           | 0.609  | 1.249                               | 1.222                                     | 1.202                                    | -                  | 0.709 |
| Tree cover, broadleaved, evergreen, closed to open (>15%)                        | 12.230 | 0.495   | 0.354     | 0.505     | 0.734    | 0.391       | 0.036  | 0.686                               | 1.354                                     | -                                        | -                  | 0.949 |
| Tree cover, broadleaved, deciduous, closed to open (>15%)                        | 2.016  | 1.477   | 1.564     | -         | 1.496    | -           | 0.294  | -                                   | 0.813                                     | 1.451                                    | -                  | 0.834 |
| Tree cover, needleleaved, evergreen, closed to open (>15%)                       | 3.695  | 0.250   | -         | -         | -        | 2.011       | 0.643  | 0.704                               | 0.431                                     | -                                        | -                  | 0.886 |
| Tree cover, needleleaved, deciduous, closed to open (>15%)                       | -      | -       | -         | -         | 1.960    | -           | -      | -                                   | -                                         | -                                        | -                  | 0.868 |
| Tree cover, mixed leaf type (broadleaved and needleleaved)                       | 5.990  | 0.520   | 0.705     | -         | 1.510    | -           | 0.463  | -                                   | -                                         | -                                        | -                  | 0.898 |
| Mosaic tree and shrub (>50%) / herbaceous cover (<50%)                           | 1.217  | -       | 1.294     | -         | 1.318    | -           | 0.429  | 1.152                               | -                                         | 1.285                                    | -                  | 0.724 |
| Mosaic herbaceous cover (>50%) / tree and shrub (<50%)                           | 0.788  | 1.543   | 1.232     | 1.675     | -        | -           | -      | -                                   | -                                         | -                                        | -                  | 0.874 |
| Shrubland                                                                        | 0.535  | 1.758   | 2.133     | 1.309     | -        | 1.678       | 1.603  | -                                   | 0.702                                     | -                                        | 0.626              | 0.873 |
| Grassland                                                                        | 0.468  | 1.469   | 1.612     | 2.132     | 1.348    | 1.928       | 1.280  | 1.281                               | 0.700                                     | 1.240                                    | 1.453              | 0.806 |
| Lichens and mosses                                                               | -      | -       | -         | 19.148    | -        | -           | -      | -                                   | -                                         | -                                        | -                  | 0.972 |
| Sparse vegetation (tree, shrub, herbaceous cover)(<15%)                          | 0.111  | 1.547   | 2.073     | 2.205     | -        | 1.770       | 3.919  | -                                   | 0.449                                     | -                                        | -                  | 0.937 |
| Tree cover, flooded, fresh or brakish water                                      | 1.824  | -       | 0.622     | 0.660     | 2.793    | -           | -      | -                                   | -                                         | -                                        | 2.109              | 0.886 |
| Tree cover, flooded, saline water                                                | -      | -       | -         | -         | 2.021    | -           | 0.292  | -                                   | 1.374                                     | -                                        | 1.733              | 0.888 |
| Shrub or herbaceous cover, flooded, fresh/ saline/brakish water                  | 0.649  | 1.430   | 1.191     | -         | 2.585    | 0.636       | -      | 1.242                               | -                                         | -                                        | 1.990              | 0.802 |
| Urban area                                                                       | -      | -       | 1.352     | -         | 1.611    | -           | 0.676  | 1.755                               | 1.409                                     | 3.582                                    | 1.718              | 0.768 |
| Bare areas                                                                       | 0.174  | -       | 2.147     | 1.457     | -        | 2.717       | 5.375  | -                                   | 0.558                                     | -                                        | -                  | 0.877 |
| Water bodies                                                                     | 0.651  | -       | -         | -         | 2.167    | -           | 0.487  | 1.221                               | -                                         | 1.598                                    | 1.939              | 0.749 |

Positive association (odds ratio = 1.121 - 1.393)

Positive association (odds ratio = 1.396 - 1.704)

Positive association (odds ratio = 1.708 - 19.148)

Negative association

Non significant association

242

Figure 3. Odds ratio values describing the association between ESA-CCI land-cover classes and IUCN habitat classes. Odds ratio values significantly < 1 indicate a negative association, values significantly > 1 indicate a positive association. The positive associations are divided into tertiles (shown in shades of green), indicating three possible options for setting a threshold to convert continuous variables into a binary association/non-association variable for creating AOH maps. AUC indicates the values of Area Under the Curve from a ROC, a measure of accuracy of a classification model.

243

244

245

246

247

Savanna, Shrubland and Grassland habitat classes were associated with “shrubs”, “herbaceous vegetation” and “cultivated and managed vegetation agriculture” in CGLS-LC100 land cover, and “cropland”, “herbaceous cover”, “shrubland”, “grassland”, “sparse vegetation”, “mosaic cropland” and “mosaic herbaceous cover” in ESA-CCI. However, the power of association varied between these different combinations. The Savanna

248 habitat class was also associated with some forest classes while *Shrubland* and *Grassland* habitats were also  
249 associated with bare areas.

250  
251 We divided artificial terrestrial habitats into three different classes: *Artificial arable and pasture lands*,  
252 *Artificial degraded forest and plantations*, and *Artificial urban and rural gardens*. These habitats had the least  
253 certain relationships because the odds ratio values were the closest to 1 (CGLS-LC100 average positive odds  
254 ratio = 1.367, 1.333 and 1.577 respectively; ESA-CCI average positive odds ratio = 1.468, 1.370 and 1.579  
255 respectively). Some unexpected land-cover classes were associated with these habitat classes, e.g. *Arable and*  
256 *pasture lands* and *degraded forest and plantations* were associated with “urban areas”. However, these  
257 unexpected associations disappeared when increasing the threshold.

258  
259 *Wetland* and *Artificial aquatic* habitats had intermediate odds ratio values (CGLS-LC100 average positive odds  
260 ratio = 1.7; ESA-CCI average positive odds ratio = 1.8). In terms of land-cover associations, they were  
261 associated (in some cases strongly) with land-cover classes related to water, but also to some land-cover classes  
262 that have no relation with wetlands or aquatic environments (e.g. some type of forest or cultivated areas).

263  
264 The AUC of models for CGLS-LC100 ranged from 0.644 to 0.940. The land-cover classes with the lowest  
265 AUC were the “open and closed unknown forest” (AUC = 0.644 and 0.736) classes, followed by “water  
266 bodies” (AUC = 0.745) and “urban areas” (AUC = 0.763). Those with the highest AUC values were the other  
267 forest classes (AUC range 0.854 – 0.940) and “bare and sparse vegetation” (AUC = 0.924). For ESA-CCI, the  
268 AUC ranged from 0.709 to 0.972. The land-cover classes with the lowest AUC were mosaic land-cover classes  
269 (AUC range 0.709 - 0.874), followed by “water bodies” (AUC = 0.750) and “urban areas” (AUC = 0.768).  
270 The land-covers with the highest AUC values were “lichens and mosses” (AUC = 0.972), “cropland irrigated  
271 or post-flooding” (AUC = 0.954), “sparse vegetation” (AUC = 0.937) and tree cover land classes (AUC range  
272 0.834 – 0.949).

273  
274 The results of the models can also be mapped spatially (Fig. 4) using one of the three thresholds of associations  
275 between habitat and land-cover classes. In such maps, habitats are overlaid because the same land-cover class  
276 may represent more than one habitat class and/or because both habitats occur in the same geographical areas.  
277 The overlap among habitats increases as the threshold of association is reduced.

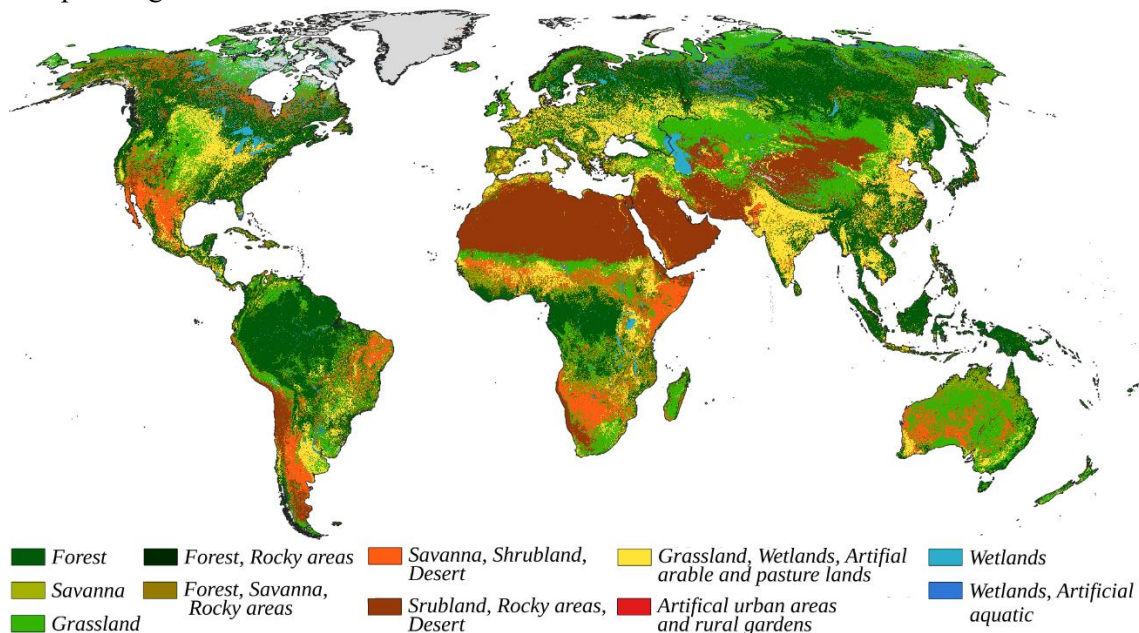

Figure 4 Map of habitat classes (Level 1) from the IUCN Habitat classification scheme based on the highest threshold for CGLS-LC100 data-derived translation (Fig 2) .



279 To compare the performance of the data-driven table and the expert-derived table, we used 211,304 point  
 280 localities for 489 species of mammal and 461,277 point localities for 2,112 species of bird. We compared the  
 281 point prevalence (the proportion of georeferenced points falling in the land-cover classes assigned by each  
 282 translation table according to the habitat of each species) between our data-driven method and the expert based  
 283 assessment of Santini et al., and found that point prevalence in Santini et al., (2019) was similar to the point  
 284 prevalence we found from our model when using the middle and high odd-ratio thresholds (Table 1). The ratio  
 285 between point prevalence and model prevalence (the proportion of the range remaining after apparently  
 286 unsuitable land cover classes are excluded) between the two methods was also very similar, and higher than 1,  
 287 indicating that the habitat associations were better than random for both approaches.

Table 1. Mean point prevalence and model prevalence for birds and mammals using the three tertile thresholds for ESA CCI land cover derived from data-driven assessment (see Figure 4) and the expert knowledge-based assessment of Santini et al., (2019).

|                  | Lower tertile threshold | Middle tertile threshold | Upper tertile threshold | Santini et al., (2019) |
|------------------|-------------------------|--------------------------|-------------------------|------------------------|
| BIRDS            |                         |                          |                         |                        |
| Point prevalence | 0.94                    | 0.81                     | 0.66                    | 0.74                   |
| Model prevalence | 0.91                    | 0.76                     | 0.59                    | 0.68                   |
| MAMMALS          |                         |                          |                         |                        |
| Point prevalence | 0.93                    | 0.82                     | 0.67                    | 0.73                   |
| Model prevalence | 0.90                    | 0.80                     | 0.62                    | 0.70                   |

288

289

## 290 DISCUSSION

291 By modeling the relationship between IUCN habitat classes and the CGLS-LC100 and ESA-CCI land-cover  
 292 classes, we generated two translation tables, quantifying the strength of association between habitat and land  
 293 cover classes. The strength of association is represented by the odd ratio values, which indicate the extent to  
 294 which a species being coded to a particular habitat class increases or decreases the odds of that species being  
 295 found in a particular land-cover class. The relationship between IUCN habitat classes and land cover classes  
 296 is expressed as a continuous variable.

297

298 Among habitat classes, *Forest*, *Desert* and *Rocky areas* have the strongest associations with land-cover classes,  
 299 perhaps owing to the higher accuracy of the relevant land-cover classes. For both CGLS-LC100 and ESA-  
 300 CCI, the highest classification accuracy classes are “forest”, “tree cover areas” and “bare soil”. Using a  
 301 different approach based on a decision tree, Jung et al., (2020) found that *Forest* has the highest validation  
 302 accuracy, although they obtained lower validation accuracy for *Rocky areas* and *Desert* habitat classes.

303

304 On the other hand, *Wetlands* and *Artificial* habitats are more difficult to represent using land-cover maps.  
 305 Wetland-related land-cover classes have the lowest classification accuracy in both land-cover maps. From a  
 306 remote sensing perspective, wetlands are difficult to map because they are highly dynamic, with rapid  
 307 phenological changes through the year (Gallant, 2015; Lumbierres et al., 2017). Remote sensing products at a  
 308 global scale cannot distinguish small ponds or temporary water bodies (Pekel et al., 2016; Klein et al., 2017).  
 309 Therefore, wetland land-cover classes have more omission errors, and this has a direct impact on the results of  
 310 our model.

311

312 Artificial land-cover classes are also difficult to map, as they tend to be more heterogeneous (Álvarez-Martínez  
 313 et al., 2018), producing misclassifications among land-cover classes. Land-cover maps have difficulty  
 314 separating artificial land-cover classes from natural ecosystems, e.g., plantation from forest, grassland from  
 315 cropland, or lake from reservoir (Álvarez-Martínez et al., 2018). Overall, species richness and average  
 316 abundance are often lower in artificial environments than in their natural equivalent, even if there is variation

317 across different biogeographical contexts (Barlow et al., 2007; Newbold et al., 2015) and this introduces  
318 commission errors. Moreover, we found that artificial land-cover are associated with some natural habitat  
319 classes. This is likely a consequence of greater accessibility of these habitats, and hence disproportionate  
320 prevalence in citizen science data (Meyer et al., 2015). Because a high proportion of citizen science point  
321 location data are recorded in artificial land-cover classes, there is an increased probability that species primarily  
322 associated with natural habitats are reported there, so a data-driven method may associate some natural habitats  
323 with artificial land-cover classes.

324  
325 There are several differences between the two land-cover layers used to produce the translation tables that  
326 could determine the use of the table. CGLS-LC100 has a resolution of 100 m while ESA-CCI has a coarser  
327 resolution of 300 m, also CGLS-LC100 has an overall classification accuracy of 80.2% compared with 71.1%  
328 for ESA-CCI. Moreover, CGLS-LC100 avoids using mosaics classes and in general, mapping less complex  
329 habitats is easier than more heterogeneous habitats (Corbane et al., 2015; Álvarez-Martínez et al., 2018).  
330 However, ESA-CCI has the advantage of being available as a longer time series, 1992-2020 for ESA-CCI vs  
331 2015-2019 for CGLS-LC100, which allows studying habitat changes. For both land cover maps we excluded  
332 some land-cover classes because of the lack of point localities; we recommend adding these land cover classes  
333 manually when using the translation tables, according to the user's needs.

334  
335 The coding of habitats to each species on the IUCN Red List could introduce some noise to the modeling  
336 process. Coding is based on qualitative assessment by experts, and is therefore susceptible to individual biases  
337 (Brooks et al., 2019; Santini et al., 2019). The current version of the Habitat Classification Scheme on the  
338 IUCN website is described as a draft version. We, therefore, recommend that IUCN updates and improves this  
339 document and anticipate this would influence our odds ratio estimates.

340  
341 Both the data-driven table and the expert knowledge translation table represented land cover distribution inside  
342 the range better than random. However, our data-driven approach presents several advantages compared to an  
343 expert knowledge approach. We present the relationship between IUCN habitat and land cover classes as a  
344 continuous variable, allowing greater flexibility in using the results. To use the model to produce AOH maps,  
345 the user is able to decide a threshold of association to transform the results into a binary table according to the  
346 required balance between omission and commission errors. Moreover, a data-driven approach allows us to  
347 quantify the uncertainty associated with the habitat to land cover association and could help to evaluate  
348 potential uncertainties in the AOH maps. This approach can be used to develop a translation table between any  
349 set of habitat codes and any set of land cover variables at a global or regional scale. As better data (species  
350 point and land-cover maps) become available, the translation table can be improved, assuring objectivity,  
351 standardization, and repeatability.

352

## 353 **ACKNOWLEDGEMENTS**

354 This research is part of the Inspire4Nature Innovative Training Network, funded by the European Union's  
355 Horizon 2020 research and innovation program under the Marie Skłodowska-Curie grant agreement no.  
356 766417. MDM acknowledges support from the MIUR Rita Levi MontalcinLevii programme.

357

## 358 **AUTHOR CONTRIBUTIONS**

359 ML, CR, PFD, and SHMB conceived the study. ML and PFD develop the analysis. ML led the writing of the  
360 manuscript. All authors contributed to drafts and gave final approval for publication.

361

362

## 363 **REFERENCES**

364 Álvarez-Martínez JM, Jiménez-Alfaro B, Barquín J, Ondiviela B, Recio M, Silió-Calzada A, Juanes JA.  
365 2018. Modelling the area of occupancy of habitat types with remote sensing. *Methods in Ecology and*

- 366 Evolution **9**:580–593.
- 367 Barlow J et al., 2007. Quantifying the biodiversity value of tropical primary, secondary, and plantation  
368 forests. *Proceedings of the National Academy of Sciences of the United States of America* **104**:18555–  
369 18560.
- 370 Beresford AE, Buchanan GM, Donald PF, Butchart SHM, Fishpool LDC, Rondinini C. 2011. Poor overlap  
371 between the distribution of Protected Areas and globally threatened birds in Africa. *Animal*  
372 *Conservation* **14**:99–107.
- 373 Bird TJ et al., 2014. Statistical solutions for error and bias in global citizen science datasets. *Biological*  
374 *Conservation* **173**:144–154. Elsevier Ltd. Available from  
375 <http://dx.doi.org/10.1016/j.biocon.2013.07.037>.
- 376 Boitani L, Maiorano L, Baisero D, Falcucci A, Visconti P, Rondinini C. 2011. What spatial data do we need  
377 to develop global mammal conservation strategies? *Philosophical Transactions of the Royal Society B:*  
378 *Biological Sciences* **366**:2623–2632.
- 379 Bradley BA, Olsson AD, Wang O, Dickson BG, Pelech L, Sesnie SE, Zachmann LJ. 2012. Species detection  
380 vs. habitat suitability: Are we biasing habitat suitability models with remotely sensed data? *Ecological*  
381 *Modelling* **244**:57–64. Elsevier B.V. Available from <http://dx.doi.org/10.1016/j.ecolmodel.2012.06.019>.
- 382 Bradter U, Mair L, Jönsson M, Knappe J, Singer A, Snäll T. 2018. Can opportunistically collected Citizen  
383 Science data fill a data gap for habitat suitability models of less common species? *Methods in Ecology*  
384 *and Evolution* **9**:1667–1678.
- 385 Brooks TM et al., 2019. Measuring Terrestrial Area of Habitat (AOH) and Its Utility for the IUCN Red List.  
386 *Trends in Ecology & Evolution* **xx**:1–10. The Authors. Available from  
387 <https://linkinghub.elsevier.com/retrieve/pii/S0169534719301892>.
- 388 Buchanan GM, Butchart SHM, Dutson G, Pilgrim JD, Steininger MK, Bishop KD, Mayaux P. 2008. Using  
389 remote sensing to inform conservation status assessment: Estimates of recent deforestation rates on  
390 New Britain and the impacts upon endemic birds. *Biological Conservation* **141**:56–66.
- 391 Buchhorn M, Smets B, Bertels L, Lesiv M, Tsendbazar N-E, Herold M, Fritz SA. 2019. Copernicus Global  
392 Land Service: Land Cover 100m: epoch 2015: Globe. Dataset of the global component of the  
393 Copernicus Land Monitoring Service le.
- 394 Copernicus Global Land Operations “Vegetation and Energy.” 2018a. PRODUCT USER MANUAL,  
395 MODERATE DYNAMIC LAND COVER 100M VERSION 2.
- 396 Copernicus Global Land Operations “Vegetation and Energy.” 2018b. VALIDATION REPORT MODERATE  
397 DYNAMIC LAND COVER COLLECTION 100M VERSION 2.0:1–44.
- 398 Corbane C, Lang S, Pipkins K, Alleaume S, Deshayes M, García Millán VE, Strasser T, Vanden Borre J,  
399 Toon S, Michael F. 2015. Remote sensing for mapping natural habitats and their conservation status -  
400 New opportunities and challenges. *International Journal of Applied Earth Observation and*  
401 *Geoinformation* **37**:7–16. Elsevier B.V. Available from <http://dx.doi.org/10.1016/j.jag.2014.11.005>.
- 402 Crawford BA, Olds MJ, Maerz JC, Moore CT. 2020. Estimating population persistence for at-risk species  
403 using citizen science data. *Biological Conservation* **243**:108489. Elsevier. Available from  
404 <https://doi.org/10.1016/j.biocon.2020.108489>.
- 405 Di Marco M, Watson JEM, Possingham HP, Venter O. 2017. Limitations and trade-offs in the use of species  
406 distribution maps for protected area planning. *Journal of Applied Ecology* **54**:402–411.
- 407 Díaz S et al., 2019. Pervasive human-driven decline of life on Earth points to the need for transformative  
408 change. *Science* **366**.
- 409 Ducatez S, Sayol F, Sol D, Lefebvre L. 2018. Are urban vertebrates city specialists, artificial habitat  
410 exploiters, or environmental generalists? *Integrative and Comparative Biology* **58**:929–938.
- 411 eBird Basic Dataset. Version: EBD\_January-2019. Cornell Lab of Ornithology, Ithaca, New York. 2019.
- 412 ESA. 2017. Land Cover CCI Product User Guide Version 2. Tech. Rep. Available at:  
413 [maps.elie.ucl.ac.be/CCI/viewer/download/ESACCI-LC-Ph2-PUGv2\\_2.0.pdf](https://maps.elie.ucl.ac.be/CCI/viewer/download/ESACCI-LC-Ph2-PUGv2_2.0.pdf), Paris, France. Available  
414 from [http://maps.elie.ucl.ac.be/CCI/viewer/download/ESACCI-LC-Ph2-PUGv2\\_2.0.pdf](http://maps.elie.ucl.ac.be/CCI/viewer/download/ESACCI-LC-Ph2-PUGv2_2.0.pdf).
- 415 Ficetola GF, Rondinini C, Bonardi A, Baisero D, Padoa-Schioppa E. 2015. Habitat availability for

- 416 amphibians and extinction threat: A global analysis. *Diversity and Distributions* **21**:302–311.
- 417 Ficitola GF, Rondinini C, Bonardi A, Katariya V, Padoa-Schioppa E, Angulo A. 2014. An evaluation of the  
418 robustness of global amphibian range maps. *Journal of Biogeography* **41**:211–221.
- 419 Gallant AL. 2015. The challenges of remote monitoring of wetlands. *Remote Sensing* **7**:10938–10950.
- 420 GBIF.org (04 March 2020) GBIF Occurrence Download. 2020. Available from  
421 <https://doi.org/10.15468/dl.tvtiqq>.
- 422 GBIF.org (14 January 2019) GBIF Occurrence Download. 2019. Available from  
423 <https://doi.org/10.15468/dl.tk87g2>.
- 424 GBIF.org (23 December 2020) GBIF Occurrence Download. 2020. Available from  
425 <https://doi.org/10.15468/dl.swey54>.
- 426 GBIF.org (24 February 2020) GBIF Occurrence Download. 2020. Available from  
427 <https://doi.org/10.15468/dl.5vqa7s>.
- 428 GBIF.org (26 January 2019) GBIF Occurrence Download. 2019. Available from  
429 <https://doi.org/10.15468/dl.8bfl5p>.
- 430 Gueta T, Carmel Y. 2016. Quantifying the value of user-level data cleaning for big data: A case study using  
431 mammal distribution models. *Ecological Informatics* **34**:139–145. Elsevier B.V. Available from  
432 <http://dx.doi.org/10.1016/j.ecoinf.2016.06.001>.
- 433 IUCN. 2012. Habitats Classification Scheme (Version 3.1).
- 434 IUCN. 2013. Documentation standards and consistency checks for IUCN Red List assessments and species  
435 accounts. Version 2. Available from  
436 [http://www.iucnredlist.org/documents/RL\\_Standards\\_Consistency.pdf](http://www.iucnredlist.org/documents/RL_Standards_Consistency.pdf).
- 437 IUCN. 2020. The IUCN Red List of Threatened Species. Version 2020-2.
- 438 Johnson CJ, Gillingham MP. 2004. Mapping uncertainty: Sensitivity of wildlife habitat ratings to expert  
439 opinion. *Journal of Applied Ecology* **41**:1032–1041.
- 440 Jung M, Dahal PR, Butchart SHM, Donald PF, De Lamo X, Lesiv M, Kapos V, Rondinini C, Visconti P.  
441 2020. A global map of terrestrial habitat types. *Scientific Data* **7**:1–8. Springer US. Available from  
442 <http://dx.doi.org/10.1038/s41597-020-00599-8>.
- 443 King G, Zeng L. 2001. Logistic Regression in Rare. *Political Analysis* **9**:137–163.
- 444 Klein I, Gessner U, Dietz AJ, Kuenzer C. 2017. Global WaterPack – A 250 m resolution dataset revealing the  
445 daily dynamics of global inland water bodies. *Remote Sensing of Environment* **198**:345–362. Elsevier  
446 Inc. Available from <http://dx.doi.org/10.1016/j.rse.2017.06.045>.
- 447 Lumbierres M, Méndez PF, Bustamante J, Soriguer R, Santamaría L. 2017. Modeling biomass production in  
448 seasonal wetlands using MODIS NDVI land surface phenology. *Remote Sensing* **9**:1–18.
- 449 Meyer C. 2012. Limitations in global information on species occurrences. *Frontiers of Biogeography* **4**:217–  
450 220.
- 451 Meyer C, Jetz W, Guralnick RP, Fritz SA, Kreft H. 2016. Range geometry and socio-economics dominate  
452 species-level biases in occurrence information:1181–1193.
- 453 Meyer C, Kreft H, Guralnick RP, Jetz W. 2015. Global priorities for an effective information basis of  
454 biodiversity distributions. *Nature Communications* **6**:1–8. Nature Publishing Group. Available from  
455 <http://dx.doi.org/10.1038/ncomms9221>.
- 456 Montesino Pouzols F, Toivonen T, Di Minin E, Kukkala AS, Kullberg P, Kuusterä J, Lehtomäki J, Tenkanen  
457 H, Verburg PH, Moilanen A. 2014. Global protected area expansion is compromised by projected land-  
458 use and parochialism. *Nature* **516**:383–386. Nature Publishing Group. Available from  
459 <http://www.nature.com/articles/nature14032> (accessed October 1, 2019).
- 460 Newbold T et al., 2015. Global effects of land use on local terrestrial biodiversity. *Nature* **520**:45–50.
- 461 Pekel JF, Cottam A, Gorelick N, Belward AS. 2016. High-resolution mapping of global surface water and its  
462 long-term changes. *Nature* **540**:418–422. Nature Publishing Group. Available from  
463 <http://dx.doi.org/10.1038/nature20584>.
- 464 Pimm SL, Jenkins CN, Abell R, Brooks TM, Gittleman JL, Joppa LN, Raven PH, Roberts CM, Sexton JO.  
465 2014. The biodiversity of species and their rates of extinction, distribution, and protection. *Science*



- 466           **344**:1246752–1246752. Available from <http://www.sciencemag.org/cgi/doi/10.1126/science.1246752>  
467           (accessed November 20, 2019).
- 468   Pozzolo AD, Caelen O, Johnson RA, Bontempi G, Dal Pozzolo A, Caelen O, Bontempi G, Johnson RA.  
469           2015. Calibrating Probability with Undersampling for Unbalanced Classification. 2015 IEEE  
470           Symposium Series on Computational Intelligence:159–166. IEEE. Available from  
471           <https://www.researchgate.net/publication/283349138> (accessed May 28, 2019).
- 472   Ranganathan P, Pramesh C, Aggarwal R. 2017. Common pitfalls in statistical analysis: Logistic regression.  
473           *Perspectives in Clinical Research* **8**:148–151. Medknow Publications.
- 474   Rondinini C et al., 2011. Global habitat suitability models of terrestrial mammals. *Philosophical Transactions*  
475           *of the Royal Society B: Biological Sciences* **366**:2633–2641.
- 476   Rondinini C, Boitani L. 2012. Mind the map: trips and pitfalls in making and reading maps of carnivore  
477           distribution. Pages 31–46 *Carnivore Ecology and Conservation A Handbook of Techniques*.
- 478   Rondinini C, Stuart S, Boitani L. 2005. Habitat suitability models and the shortfall in conservation planning  
479           for African vertebrates. *Conservation Biology* **19**:1488–1497.
- 480   Rondinini C, Wilson KA, Boitani L, Grantham H, Possingham HP. 2006. Tradeoffs of different types of  
481           species occurrence data for use in systematic conservation planning. *Ecology Letters* **9**:1136–1145.
- 482   Santini L, Butchart SHM, Rondinini C, Benítez-López A, Hilbers JP, Schipper AM, Cengic M, Tobias JA,  
483           Huijbregts MAJ. 2019. Applying habitat and population-density models to land-cover time series to  
484           inform IUCN Red List assessments. *Conservation Biology* **00**:1–10.
- 485   Seoane J, Bustamante J, Díaz-Delgado R. 2005. Effect of expert opinion on the predictive ability of  
486           environmental models of bird distribution. *Conservation Biology* **19**:512–522.
- 487   Tomaselli V et al., 2013. Translating land cover/land use classifications to habitat taxonomies for landscape  
488           monitoring: A Mediterranean assessment. *Landscape Ecology* **28**:905–930.
- 489  
490
